# Supplementary material for: Chemogenomics identifies acetyl-coenzyme A synthetase as a target for malaria treatment and prevention
Source: PubMed Central journal article supplement (PMC8878317; doi:10.1016/j.chembiol.2021.07.010), 2022-02-17
Supplement: mmc1.pdf [file mmc1.pdf]

## Supplemental information

### Chemogenomics identifies acetyl-coenzyme

### A synthetase as a target for malaria

### treatment and prevention

Robert L. Summers, Charisse Florida A. Pasaje, Joao P. Pisco, Josefina Striepen, Madeline R. Luth, Krittikorn Kumpornsin, Emma F. Carpenter, Justin T. Munro, De Lin, Andrew Plater, Avinash S. Punekar, Andrew M. Shepherd, Sharon M. Shepherd, Manu Vanaerschot, James M. Murithi, Kelly Rubiano, Asli Akidil, Sabine Otilie, Nimisha Mittal, A. Hazel Dilmore, Madalyn Won, Rebecca E.K. Mandt, Kerry McGowen, Edward Owen, Chris Walpole, Manuel Llinás, Marcus C.S. Lee, Elizabeth A. Winzeler, David A. Fidock, Ian H. Gilbert, Dyann F. Wirth, Jacquín C. Niles, Beatriz Baragaña, and Amanda K. Lukens

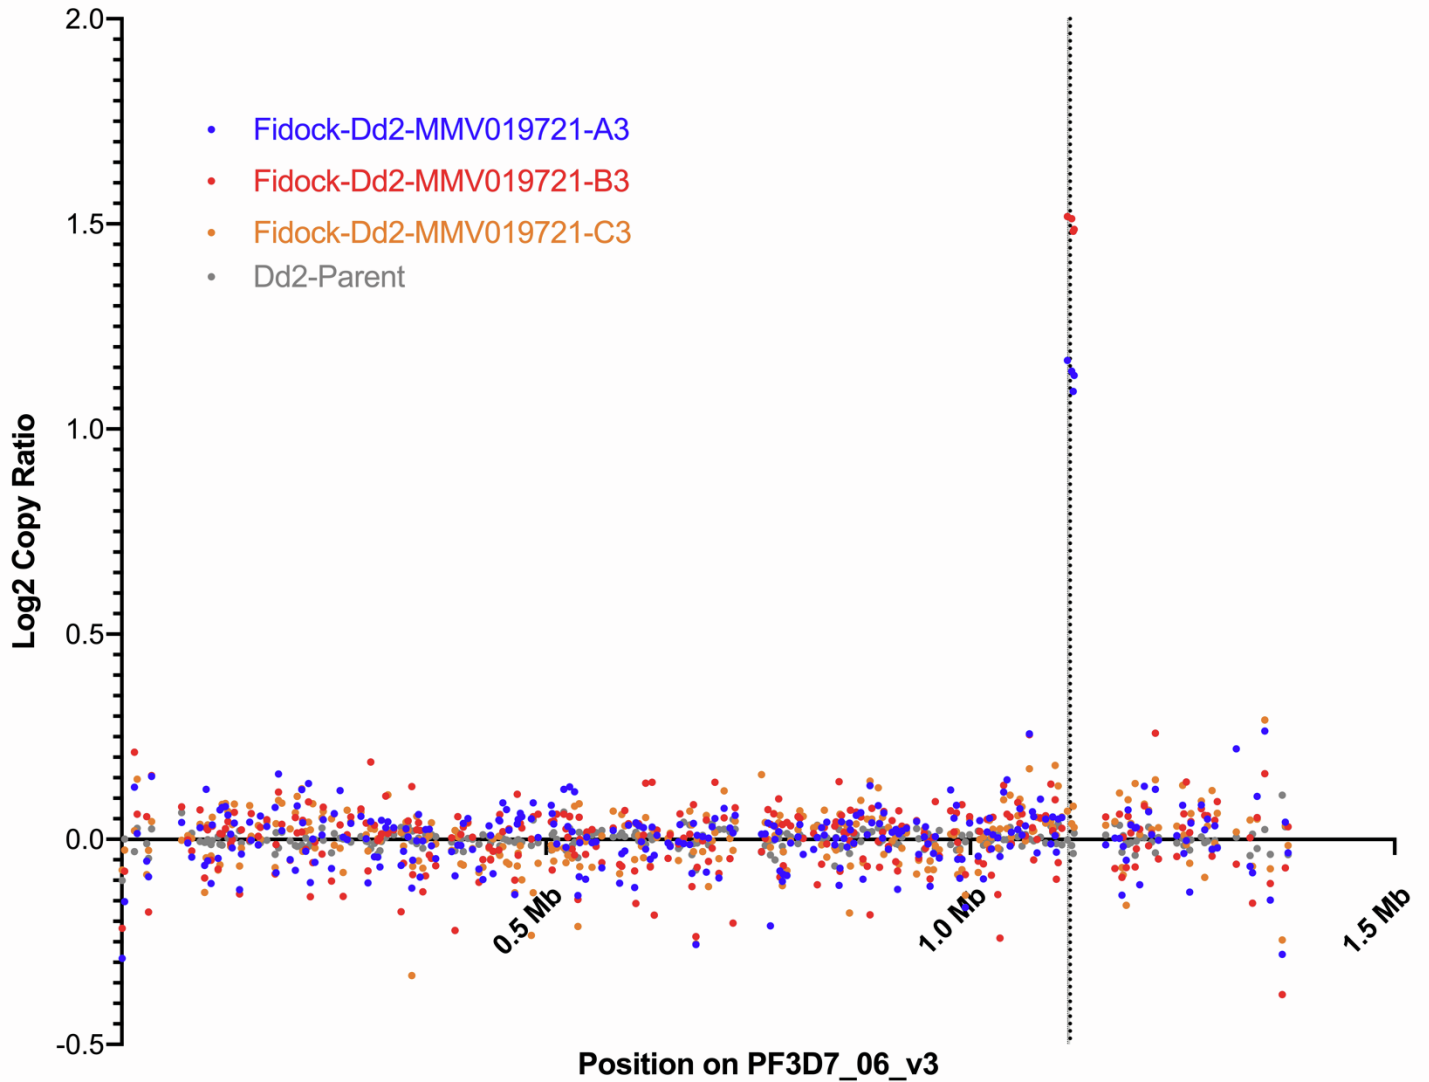

**Figure S1, related to Figure 1: Copy number variation in MMV019721-selected lines at the PF3D7\_0627800 locus, which encodes PfAcAS.** Shown are denoised Log2 copy ratios for gene intervals across chromosome 6 (PF3D7\_06\_v3) for each sample, calculated using the GATK4 CNV workflow. The dotted line indicates the position of PF3D7\_0627800. See also Supplemental Table S3

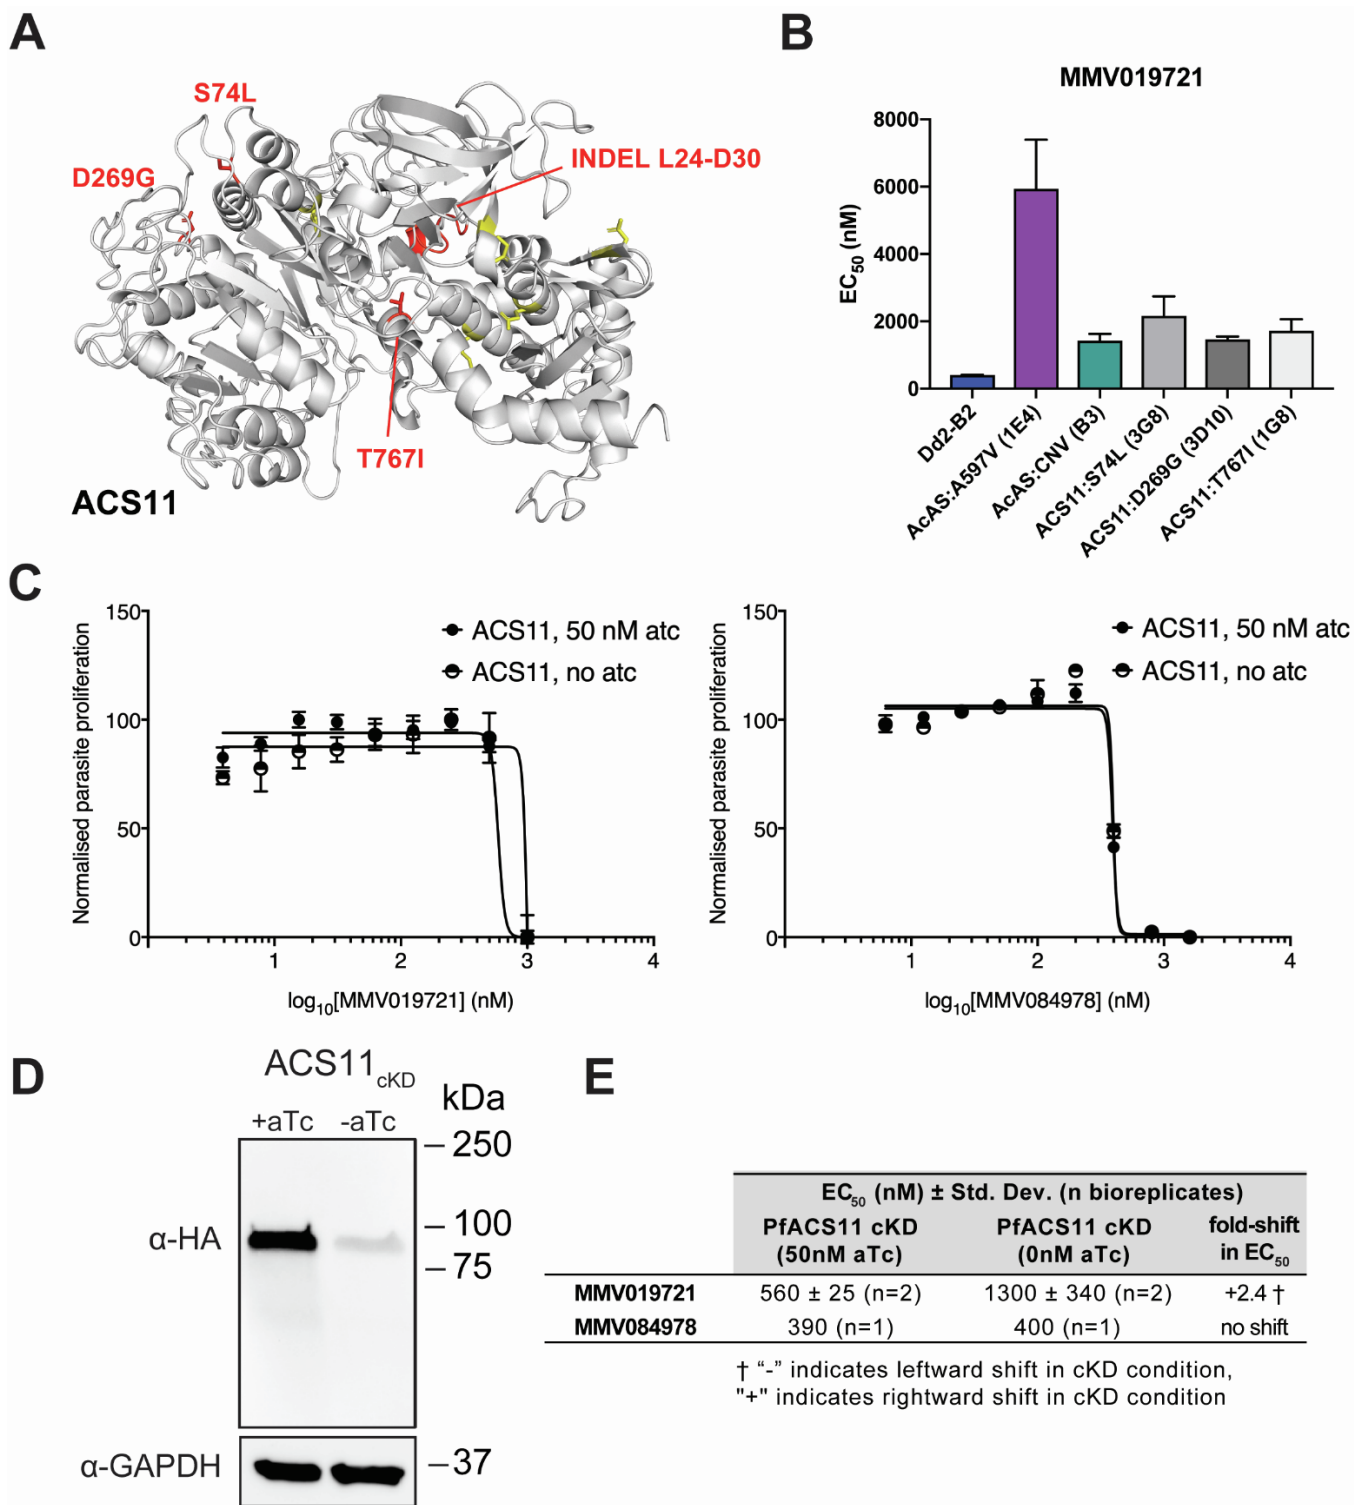

**Figure S2, related to Figure 1: The contribution of PfACS11 and PfAcAS copy number variation to altered parasite susceptibility.** A) Homology model of *PfACS11* generated by I-TASSER server. Shown in red are mutations identified in parasite clones with low level resistance to MMV019721, while those in yellow arose under selection with pantothenamides (Schalkwijk *et al.*, 2019), and in parasites resistant to MMV019719 or MMV665924 (Cowell *et al.*, 2018). B) EC<sub>50</sub> values of parasite clones bearing the A597V *PfAcAS* mutation, amplification of *PfAcAS*, and *PfACS11* mutations. Shown are mean data ± sd from 2-5 independent experiments. C) Representative effect of *PfACS11* cKD on parasite sensitivity to MMV019721 and MMV084978. D) Western blot of *PfAcAS11* protein levels in the presence (50nM) and absence of aTc after 72h. E) EC<sub>50</sub> values of MMV019721 and MMV084978 for *PfACS11* cKD parasites in the presence of high (50nM aTc) and no aTc (0nM aTc). See also Supplemental Table S1.

**A**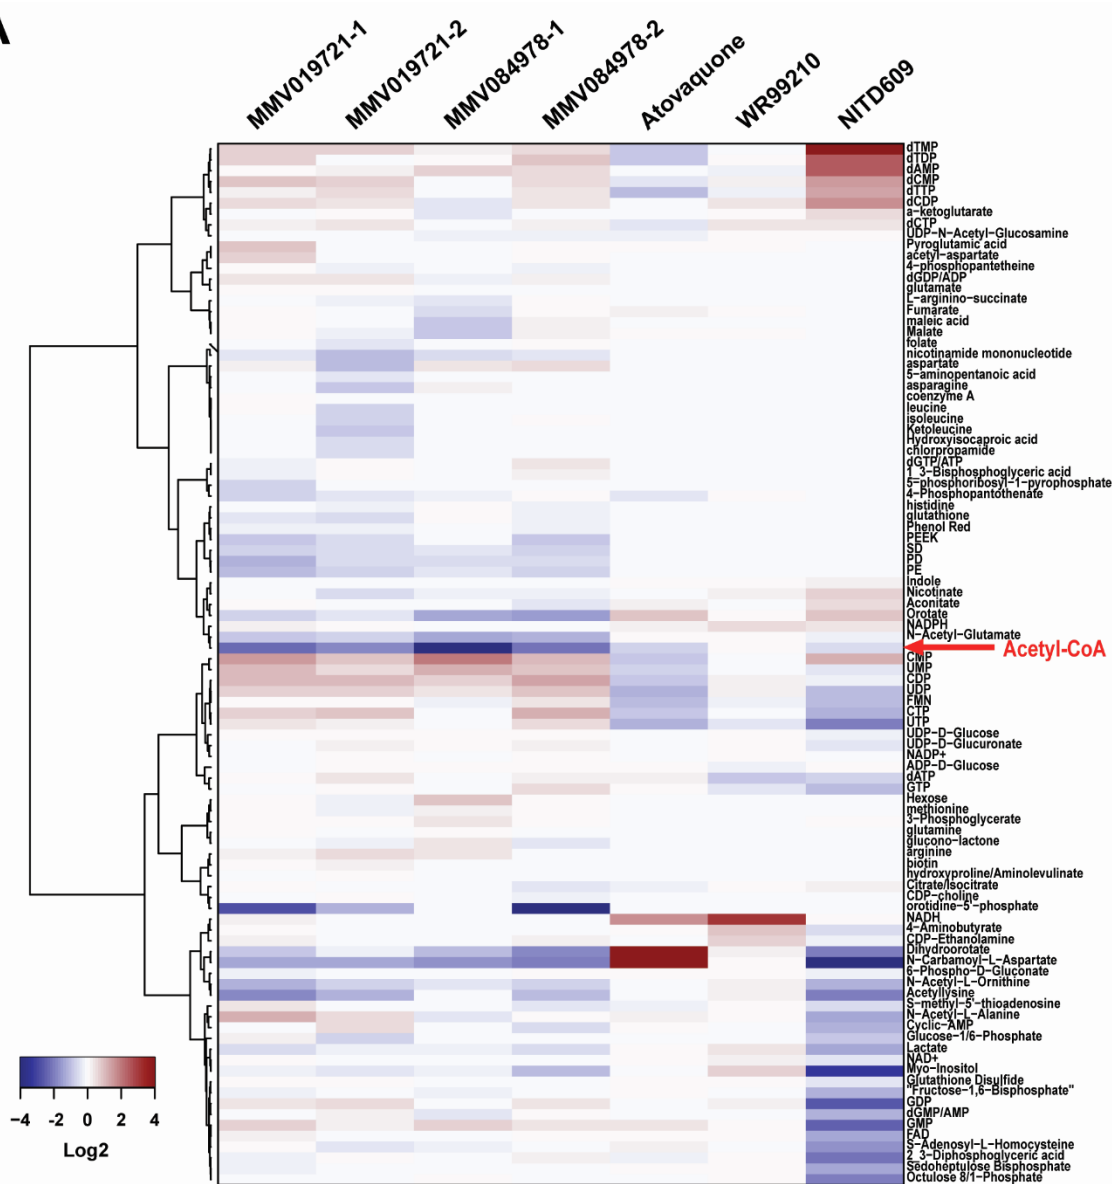**B**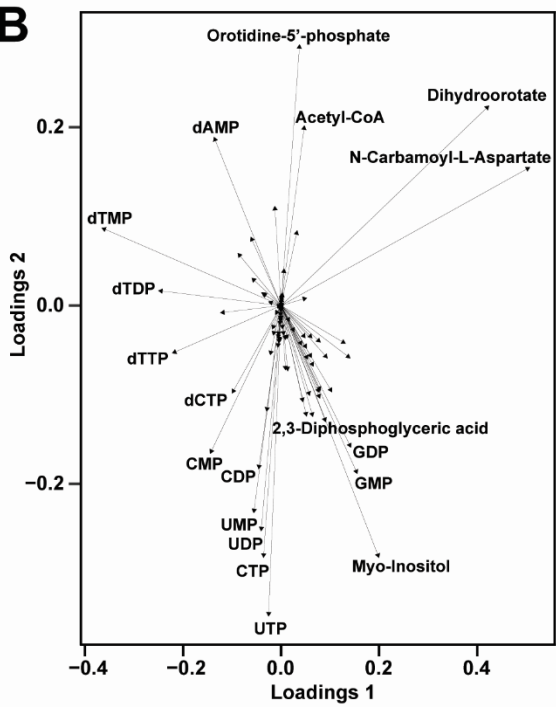**C**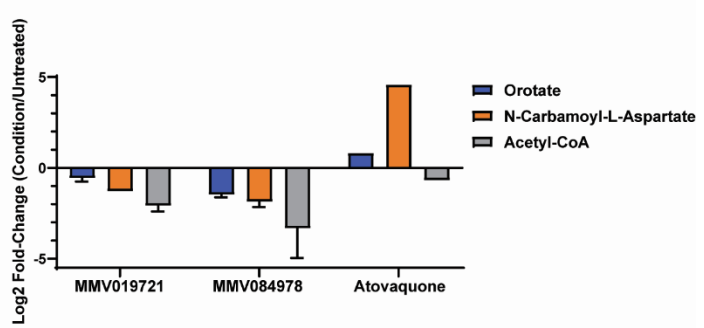**D**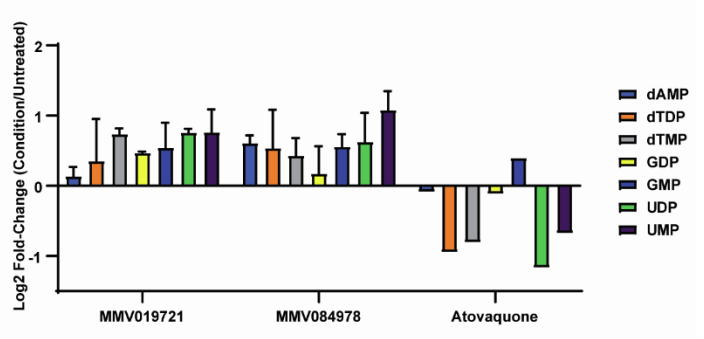

**Figure S3, related to Figure 2: Effects of MMV019721 and MMV084978 on parasite metabolism.**

A) Heatmap of Log<sub>2</sub> transformed results of treated vs no drug metabolomics comparisons on 98 detected compounds that passed quality control standards. Acetyl-CoA is marked by a red arrow. B) Loadings plot corresponding to PCA analysis (see Figure 1) performed on metabolomics data with different malaria drugs. Labelled compounds correspond to the 18 metabolites with the greatest distance from the origin of the PCA loadings plot. Metaboanalyst was used for the generation of this plot (Chong and Xia, 2018; Chong et al., 2019) C) Decreasing metabolite trends for MMV019721 and MMV084978 involve orotate metabolism as well as acetyl-CoA (averaged, n=2 + sd). D) Trend of increasing nucleotides as a result of MMV019721 or MMV084978 treatment (averaged, n=2 + sd). See also Supplemental Table S4.

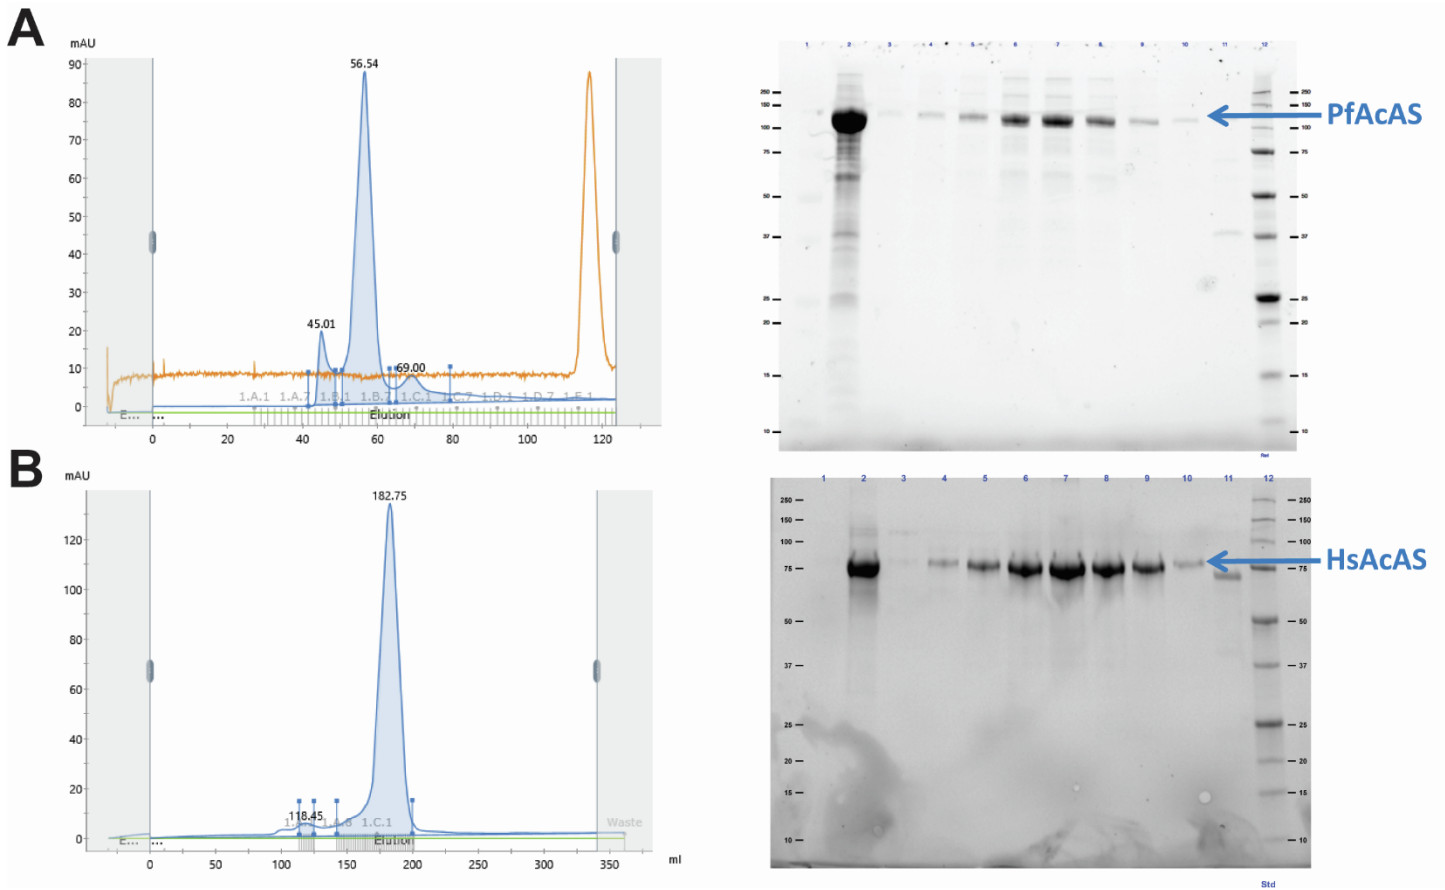

**Figure S4, related to Figure 4: Purification of *PfAcAS* and *HsAcAS* recombinant proteins.** Gel filtration elution profile of (A) full-length *PfAcAS* and (B) full-length *HsAcAS*, using a Superdex S200 column. SDS-PAGE gel of Ni-IMAC purified sample (lane 2), peak fractions from the gel filtration column (lanes 3-11) and protein molecular weight marker (lane 12) is reproduced to the right of the chromatograms.

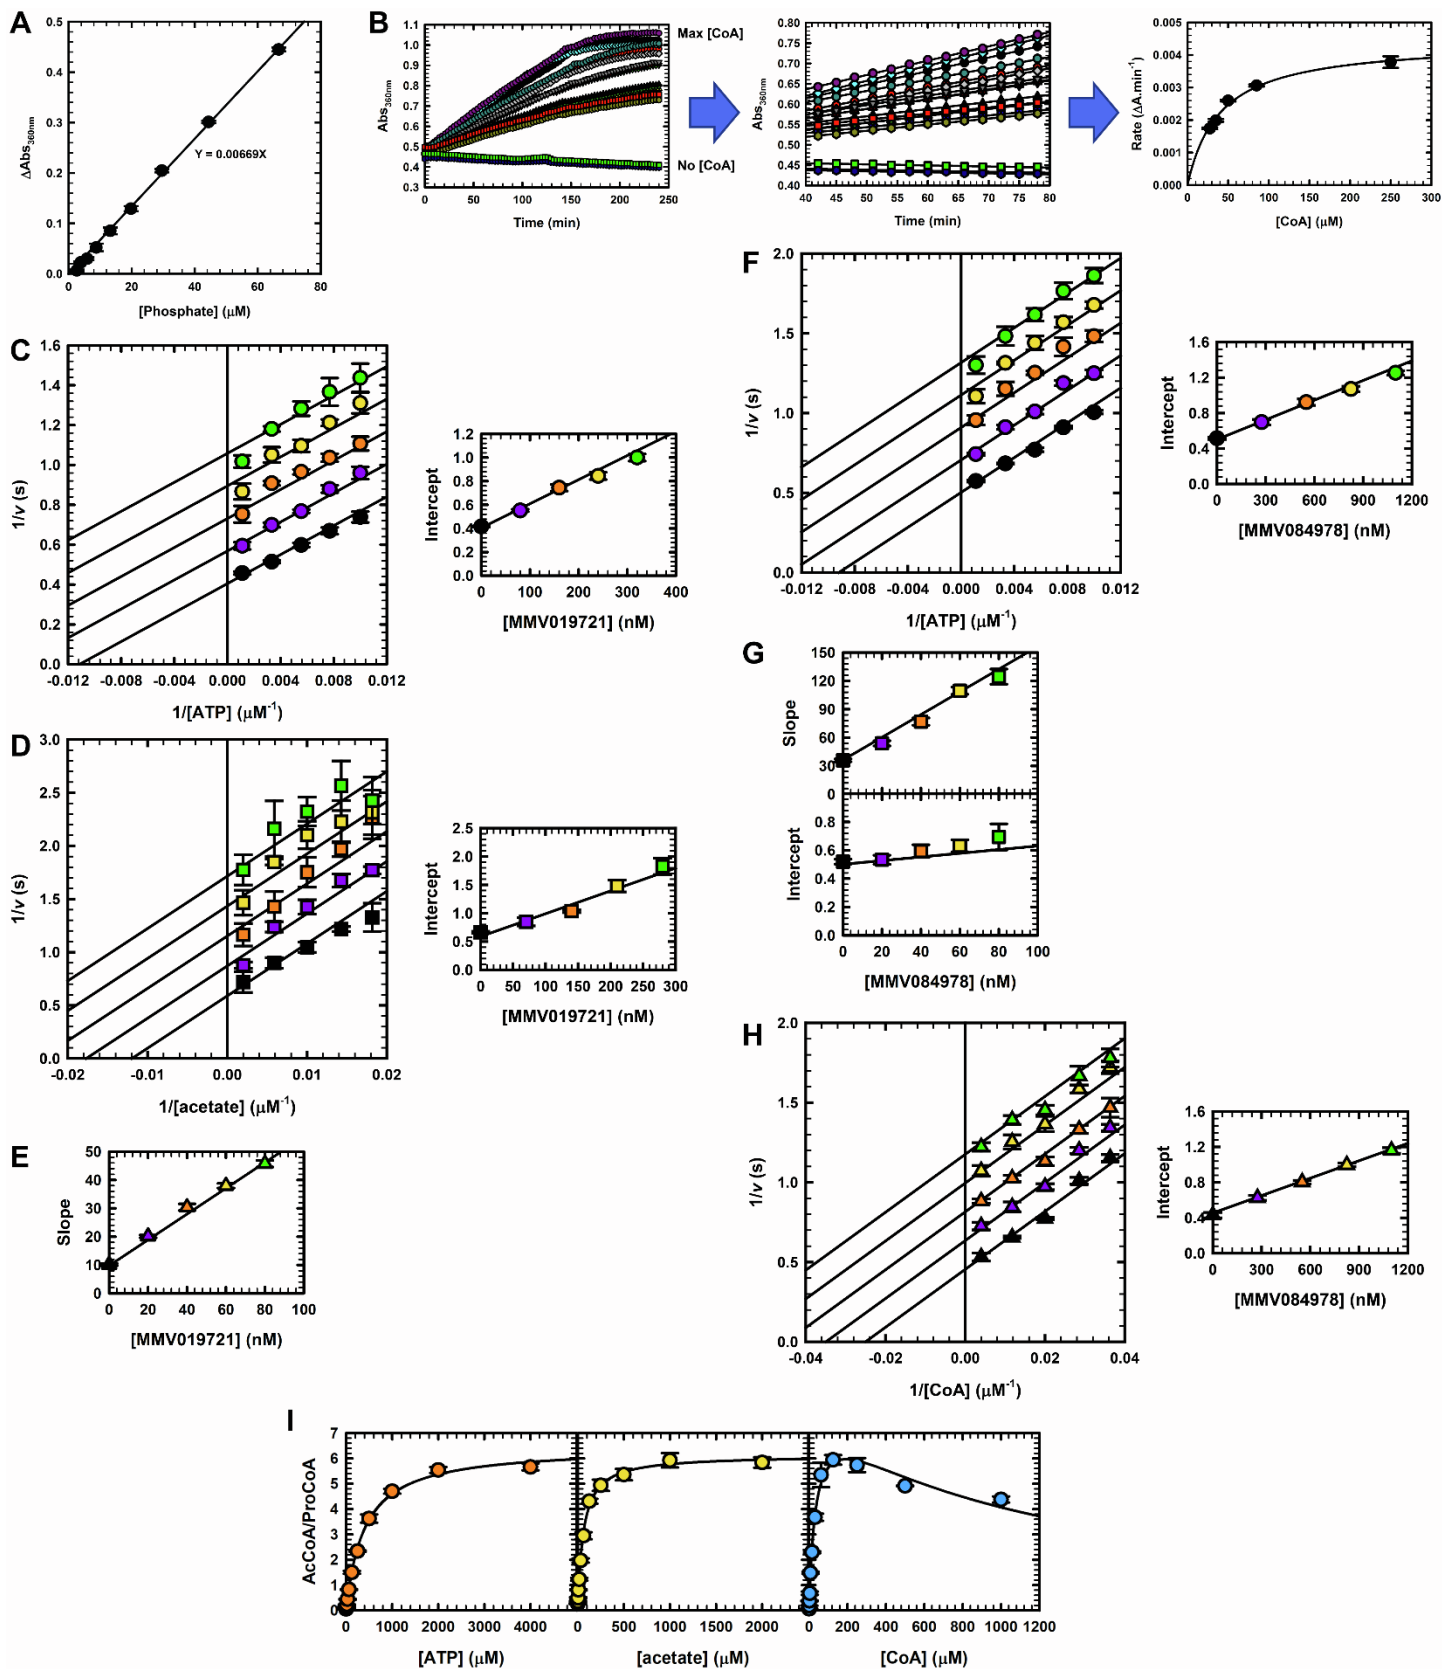

**Figure S5, related to Figure 4: Enzymology of *PfAcAS* and *HsAcAS* and mode of inhibition studies.** (A) EnzChek assay phosphate standard curve. (B) EnzChek assay data analysis, varying CoA concentration at saturating concentration of ATP and acetate. Note that in the presence of ATP and acetate, but absence of CoA, the signal does not change, meaning that pyrophosphate is not being formed. This happens because the product AcAMP remains tightly bound to the active site in the

absence of CoA, stopping the reaction. More precisely, the reaction goes through one single turnover producing pyrophosphate, however, because only 5 nM of enzyme is used in the assay, the amount of pyrophosphate produced is lower than the limit of detection of the EnzChek assay. **(C)** Double-reciprocal plot illustrating the linear, uncompetitive inhibition pattern obtained when varying the concentration of MMV019721 at fixed variable concentrations of ATP or **(D)** acetate. For all double-reciprocal plots, points are data obtained with different concentrations of MMV019721 or MMV084978, indicated in the adjacent replot of the data, and error bars indicate the standard deviation (SD). Lines are the best fit of each entire data set to eq. 6. For all replots, points are data, the lines are linear regressions of the data and error bars indicate the SD. **(E)** Replot of the slopes of the data shown in Figure 4C. **(F)** Double-reciprocal plot illustrating the linear, uncompetitive inhibition pattern obtained when varying the concentration of MMV084978 at fixed variable concentrations of ATP or **(H)** CoA. **(G)** Replots of the slopes (top panel) and intercepts (bottom panel) of the data shown in Figure 4D. Shown are the mean  $\pm$  standard deviation of the results of three independent experiments. **(I)** HsAcAS steady-state kinetics. Saturation curves for ATP (orange), acetate (yellow) and CoA (blue). Shown are the mean  $\pm$  standard deviation of the results of three independent experiments. Lines are the best fit to equations 1 (ATP and acetate) and 2 (CoA) in methods. See also Supplemental Table S5, S6.



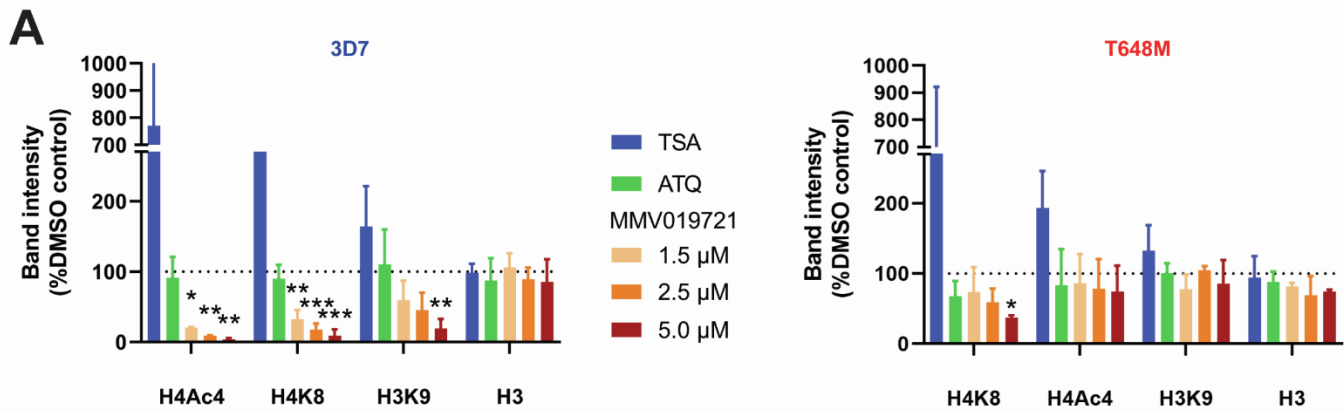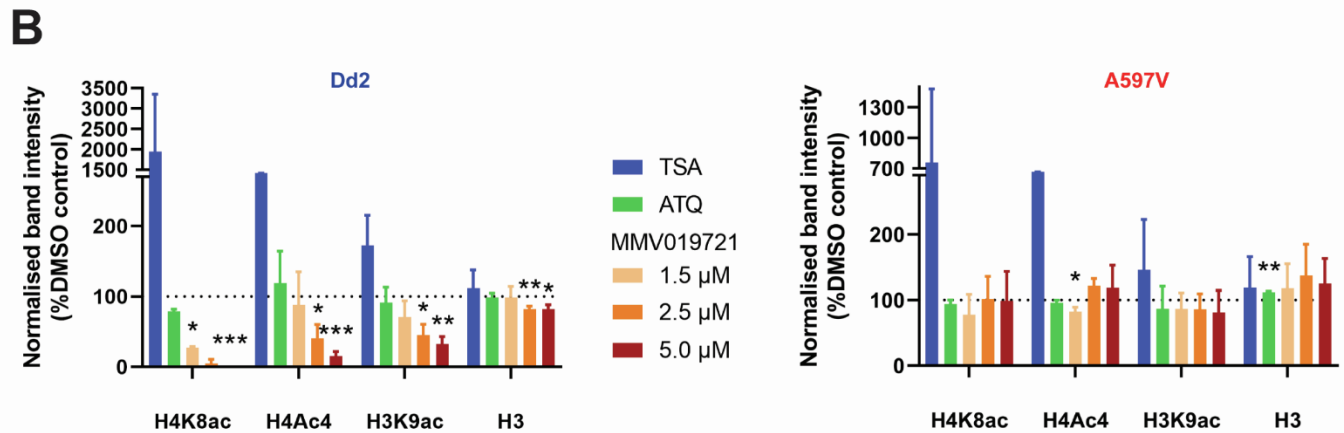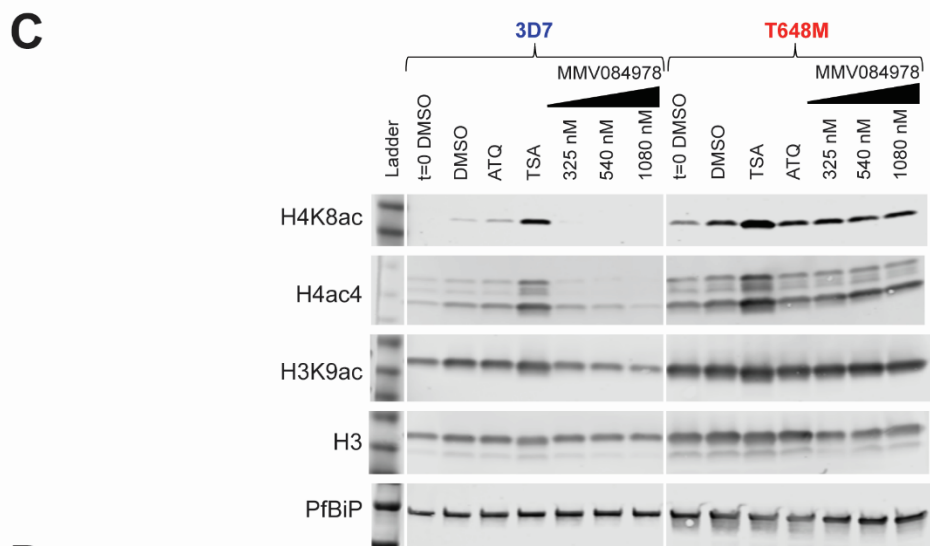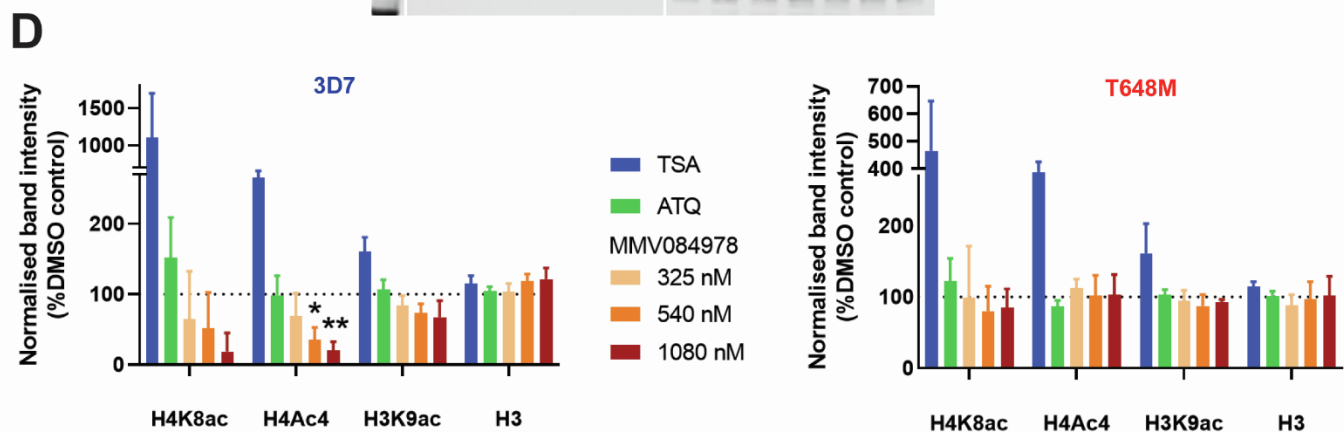

**Figure S6, related to Figure 5: Influence of MMV019721 and MMV084978 on histone acetylation.**

(A) Dose-dependent reduction of histone acetylation by MMV019721 in wildtype 3D7 parasites but not in *PfAcAS-T648M* carrying drug resistant parasites. (B) Dose-dependent reduction of histone acetylation by MMV019721 in wildtype Dd2 parasites but not in *PfAcAS-A597V* carrying drug resistant parasites. Band intensity of acetyl-histone markers was quantified using ImageJ and expressed as a percentage of the DMSO control. Shown are the mean + standard deviation of the results of four independent experiments. (C) Dose-dependent reduction of histone acetylation by MMV084978 in wildtype 3D7 parasites but not in *PfAcAS-T648M* carrying drug resistant parasites. Shown are representative western blots of a single experiment. (D) Band intensity of acetyl-histone markers was quantified using ImageJ and expressed as a percentage of the DMSO control. Shown are the mean + standard deviation of the results of four independent experiments. The asterisks denote a significant difference in the band intensity of histone markers under compound treatment compared to the DMSO control: \*\*\*  $P < 0.001$ , \*\*  $P < 0.01$ , \*  $P < 0.05$  (Dunnett's multiple comparison tests).

**A**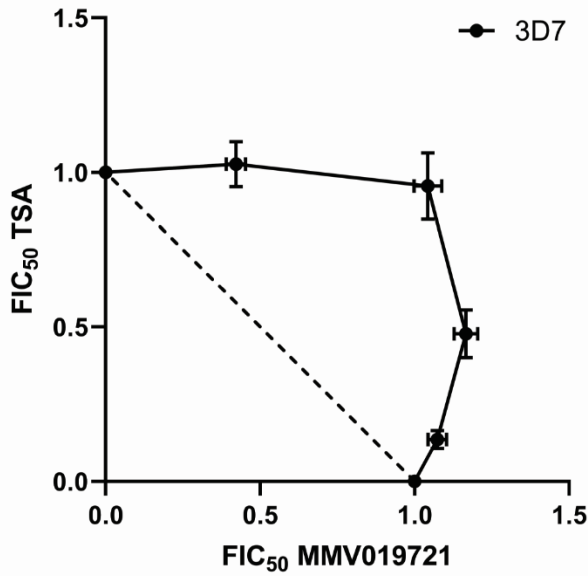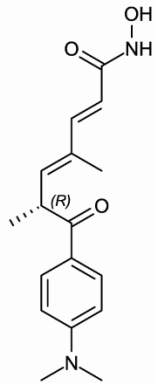**Trichosatin A**

3D7 Mean  $\Sigma$ FIC<sub>50</sub>  
 $1.6 \pm 0.05$   
 $n = 4 \pm \text{sd}$

**B**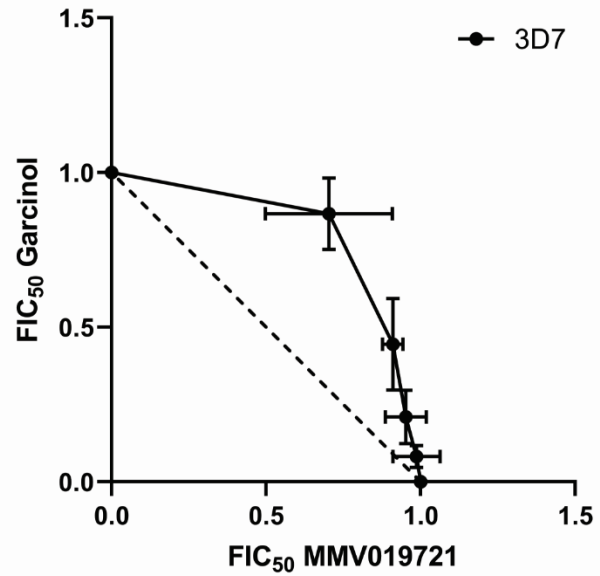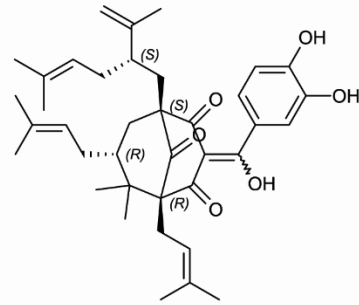**Garcinol**

3D7 Mean  $\Sigma$ FIC<sub>50</sub>  
 $1.3 \pm 0.09$   
 $n = 3 \pm \text{sd}$

**Figure S7, related to Figure 5: Antagonistic interactions between MMV019721 and histone acetylation modulators TSA (HDAC inhibitor) and Garcinol (Histone acetyltransferase inhibitor).** Data are shown as the mean  $\pm$  standard deviation in the fractional IC<sub>50</sub> value (FIC<sub>50</sub>) of each compound combination, averaged from 3-4 independent experiments, within which treatments were performed in triplicate.

**Table S5, related to Figure 4: Steady-state kinetic parameters for PfAcAS WT, T648M and A597V, and HsAcAS WT.** Values presented are mean  $\pm$  standard deviation.

| Substrate | AcAS  | Vmax (s-1)       | Km ( $\mu$ M) | Ki ( $\mu$ M)  |
|-----------|-------|------------------|---------------|----------------|
| ATP       | PfWT  | 2.4 $\pm$ 0.03   | 93 $\pm$ 4    | -              |
|           | T648M | 1.9 $\pm$ 0.03   | 400 $\pm$ 17  | -              |
|           | A597V | 0.54 $\pm$ 0.01  | 140 $\pm$ 5   | -              |
|           | HsWT  | N/A <sup>a</sup> | 400 $\pm$ 22  | -              |
| Acetate   | WT    | 2.2 $\pm$ 0.04   | 72 $\pm$ 5    | -              |
|           | T648M | 1.6 $\pm$ 0.02   | 190 $\pm$ 8   | -              |
|           | A597V | 0.54 $\pm$ 0.05  | 400 $\pm$ 12  | -              |
|           | HsWT  | N/A <sup>a</sup> | 61 $\pm$ 4    | -              |
| CoA       | WT    | 2.7 $\pm$ 0.08   | 42 $\pm$ 3    | 2700 $\pm$ 310 |
|           | T648M | 1.9 $\pm$ 0.05   | 82 $\pm$ 6    | 4200 $\pm$ 450 |
|           | A597V | 0.84 $\pm$ 0.05  | 61 $\pm$ 6    | 370 $\pm$ 40   |
|           | HsWT  | N/A <sup>a</sup> | 36 $\pm$ 5    | 1000 $\pm$ 190 |

<sup>a</sup> N/A = Not applicable; In the case of HsWT, the assay used reports on the correlation levels between AcCoA and ProCoA, and therefore the Vmax is not expressed in a unit of time.

**Table S6, related to Figure 4: Steady-state kinetic parameters for the mode of inhibition (Mol) of PfAcAS WT by MMV019721 and MMV084978. Values presented are mean  $\pm$  standard deviation.**

| Parameter             | MMV019721<br>Best fit | MMV019721<br>Mol <sup>a</sup> | MMV019721<br>Best fit | MMV019721 Mol <sup>a</sup> |
|-----------------------|-----------------------|-------------------------------|-----------------------|----------------------------|
| Vmax,ATP (s-1)        | 2.5 $\pm$ 0.05        | -                             | 2.0 $\pm$ 0.04        | -                          |
| Km,ATP ( $\mu$ M)     | 90 $\pm$ 5            | -                             | 110 $\pm$ 6           | -                          |
| Ki,ATP (nM)           | 200 $\pm$ 8           | UC <sup>b</sup>               | 680 $\pm$ 26          | UC <sup>b</sup>            |
| Vmax,acetate (s-1)    | 1.7 $\pm$ 0.06        | -                             | 2.0 $\pm$ 0.04        | -                          |
| Km,acetate ( $\mu$ M) | 84 $\pm$ 8            | -                             | 73 $\pm$ 5            | -                          |
| Kis,acetate (nM)      | 150 $\pm$ 10          | UC <sup>b</sup>               | 30 $\pm$ 3            | MI <sup>c</sup>            |
| Kii,acetate (nM)      | -                     | -                             | 390 $\pm$ 110         | MI <sup>c</sup>            |
| Vmax,CoA (s-1)        | 2.4 $\pm$ 0.02        | -                             | 2.2 $\pm$ 0.04        | -                          |
| Km,CoA ( $\mu$ M)     | 23 $\pm$ 1            | -                             | 40 $\pm$ 2            | -                          |
| Ki,CoA (nM)           | 22 $\pm$ 1            | C <sup>d</sup>                | 690 $\pm$ 24          | UC <sup>b</sup>            |

<sup>a</sup> Mol = Mode of Inhibition

<sup>b</sup> UC = uncompetitive

<sup>c</sup> MI = mixed inhibition

<sup>d</sup> C = competitive
